# Supplementary material for: Identification of Potential mRNA Biomarkers in Milk Small Extracellular Vesicles of Enzootic Bovine Leukosis Cattle
Source: MDPI journal article supplement (doi:10.3390/v14051022), 2022-05-11
Supplement: s1 [file s1]

# Supplementary Materials

**Table S1. Oligonucleotide primers used for qPCR<sup>\*1</sup>**

| Primers                | Genes                                      | Function                                      | Accession number | Sequence(5'-3')                                       | References               |
|------------------------|--------------------------------------------|-----------------------------------------------|------------------|-------------------------------------------------------|--------------------------|
| PLAC8 F<br>PLAC8 R     | Placenta-specific 8                        | Associated with cell proliferation and cancer | XM_024993443.1   | AGAACTCCAACCTGGCAGACG<br>TCCGCACAGACAGCATTCAT         | This study               |
| LGALS1 F<br>LGALS1 R   | Galectin 1                                 | Associated with cell-cell interaction         | NM_175782.1      | GTCGCCAGCAACCTGAATCT<br>TCTTTGCCCAGGTTCAGCAA          | This study               |
| DEFB4A F<br>DEFB4A R   | Defensin, beta 4A                          | Associated with inflammation                  | NM_174775.1      | GGCAAGTGCAGTCTCTTCTCC<br>GACACCCATATTCCAACGGC         | This study               |
| VIM F<br>VIM R         | Vimentin                                   | Associated with metastasis                    | NM_173969.3      | CGTCTTGACCTGGAGCGTAA<br>CGTGAGGTCAGGCTTGGA            | This study               |
| LAPTM5 F<br>LAPTM5 R   | Lysosomal protein transmembrane 5          | Associated with cell activation               | NM_001046118.2   | TCTTACATCGAACTGCCCCG<br>GCTGTAGGGTCATCAGTGGG          | This study               |
| FABP5 F<br>FABP5 R     | Fatty acid binding protein 5               | Associated with metabolism                    | NM_174315.3      | GGAAGATGGCGCTTAGTGGA<br>CACTTTTCGCAGAGCCATCC          | This study               |
| SLC2A3 F<br>SLC2A3 R   | Solute carrier family 2 member 3           | Associated with membrane transport            | NM_174603.3      | TGTTCCAACCTGGACCTCCAAC<br>ACGGGTCTCAGGAACCTTGA        | This study               |
| CD48 F<br>CD48 R       | CD48 molecule                              | Associated with cell activation               | NM_001046002.1   | CAAAGTGGCGCACTGTTCAT<br>TCTGTACAGGGTCAAGCACC          | This study               |
| CCL4 F<br>CCL4 R       | C-C motif chemokine ligand 4               | Associated with inflammation                  | NM_001075147.2   | CCCAGCCAGCTGTGGTATTC<br>CTTTCCTGCAGAACACCTGC          | This study               |
| ITGB2 F<br>ITGB2 R     | Integrin subunit beta 2                    | Associated with cell adhesion                 | NM_175781.1      | CCCAGGAGTGCACCAACTAC<br>TGTGTACAGCGAATGGAGT           | This study               |
| TMEM156 F<br>TMEM156 R | Transmembrane protein 156                  | Associated with tumor invasion                | NM_001083469     | GCTTGTGAGTCCAAAGGAAACAC<br>AAAATGTTGACAAGGTGAGTGAAAAT | This study               |
| CXCL8 F<br>CXCL8 R     | C-X-C motif chemokine ligand 8             | Associated with immunity and angiogenesis     | NM_173925.2      | AGAGCTGAGAAGCAAGATCCA<br>ACCCTACACCAGACCCACAC         | [55]                     |
| RECQL4 F<br>RECQL4 R   | RecQ like helicase 4                       | Associated with DNA replication and repair    | XM_025001549.1   | GGCTGACCACCCCCAAAACA<br>GCGGCTCAACATGAAGCAGC          | This study <sup>*2</sup> |
| SRGN F<br>SRGN R       | Serglycin                                  | Associated with hematopoiesis                 | NM_001025326     | TGGCTCTTGCCCTTCATCCTG<br>AGGACTGTCAGGATTGCACTG        | This study               |
| ACTB F<br>ACTB R       | $\beta$ -actin<br>(used for normalization) | Structural component of cell                  | DQ066897         | GCAAATGCTTCTAGGCGGACT<br>CAATCTCATCTCGTTTTCTGCG       | [56]                     |

<sup>\*1</sup> qPCR, quantitative real-time polymerase chain reaction; <sup>\*2</sup> Primers for RecQ like helicase 4 were designed by Dr. Asami Nishimori and Dr. Kiyohiko Ando (National Institute of Animal Health, NARO, Japan).

**Table S2. Reports on mRNA functions in human cancer**

| mRNA           | Function                                  | Cancer                            | References |
|----------------|-------------------------------------------|-----------------------------------|------------|
| <i>TMEM156</i> | Associated with tumor invasion            | Breast, liver and prostate cancer | [57]       |
| <i>SRGN</i>    | Associated with hematopoiesis             | Leukemia cell growth              | [58]       |
| <i>CXCL8</i>   | Associated with immunity and angiogenesis | AIDS-associated B-cell lymphoma   | [59]       |
| <i>DEFB4A</i>  | Associated with inflammation              | Colorectal cancer                 | [45]       |
| <i>FABP5</i>   | Associated with metabolism                | Prostate cancer                   | [60]       |
| <i>LAPTM5</i>  | Associated with cell activation           | Bladder cancer                    | [61]       |
| <i>LGALS1</i>  | Associated with cell-cell interaction     | Oral cancer                       | [41]       |
| <i>VIM</i>     | Associated with metastasis                | Colorectal cancer                 | [62]       |

## References

55. Kent-Dennis, C.; Aschenbach, J.; Griebel, P; Penner, G. Effects of lipopolysaccharide exposure in primary bovine ruminal epithelial cells. *J. Dairy Sci.* **2020**, *103*, 9587-9603.
56. Pareek, R.; Wellnitz, O.; Dorp, R.; Burton, J.; Kerr, D. Immunorelevant gene expression in LPS-challenged bovine mammary epithelial cells. *J. Appl. Genet.* **2005**, *46*, 171-177.
57. Cheishvii, D.; Stefanska, B.; Yi, C.; Li, C.; Yu, P.; Arakelian, A.; Tanvir, I.; Khan, H.; Rabbani, M.; Szyf, M. A common promoter hypomethylation signature in invasive breast, liver and prostate cancer cell lines reveals novel targets involved in cancer invasiveness. *Oncotarget.* **2015**, *6*, 33253-33268.
58. Peng, L.; Zhang, Y.; Xin, H. lncRNA SNHG3 facilitates acute myeloid leukemia cell growth via the regulation of miR-758-3p/SRGN axis. *J. Cell Biochem.* **2020**, *121*, 1023-1031.
59. Sharma, V.; Zhang, Li. Interleukin-8 Expression in AIDS-associated lymphoma B-cell lines. *Biochem. Biophys. Res. Commun.* **2001**, *282*, 369-375.
60. Carbonetti, G.; Wilpshaar, T.; Kroonen, J.; Studholme, K.; Converso, C.; Odelsnitz, S.; Kaczocha, M. FABP5 coordinates lipid signaling that promotes prostate cancer metastasis. *Sci. Rep.* **2019**, *9*, 18944.
61. Chen, L.; Wang, G.; Luo, Y.; Wang, Y.; Xie, C.; Jiang, W.; Xiao, Y.; Qian, G.; Wang, X. Downregulation of LAPTM5 suppresses cell proliferation and viability inducing cell cycle arrest at G0/G1 phase of bladder cancer cells. *Int. J. Oncol.* **2016**, *50*, 263-271.
62. Rezanejad Bardaji, H.; Asadi, M.; Yaghoobi, M. Long noncoding RNA VIM-AS1 promotes colorectal cancer progression and metastasis by inducing EMT. *Eur. J. Cell Biol.* **2018**, *97*, 279-288.

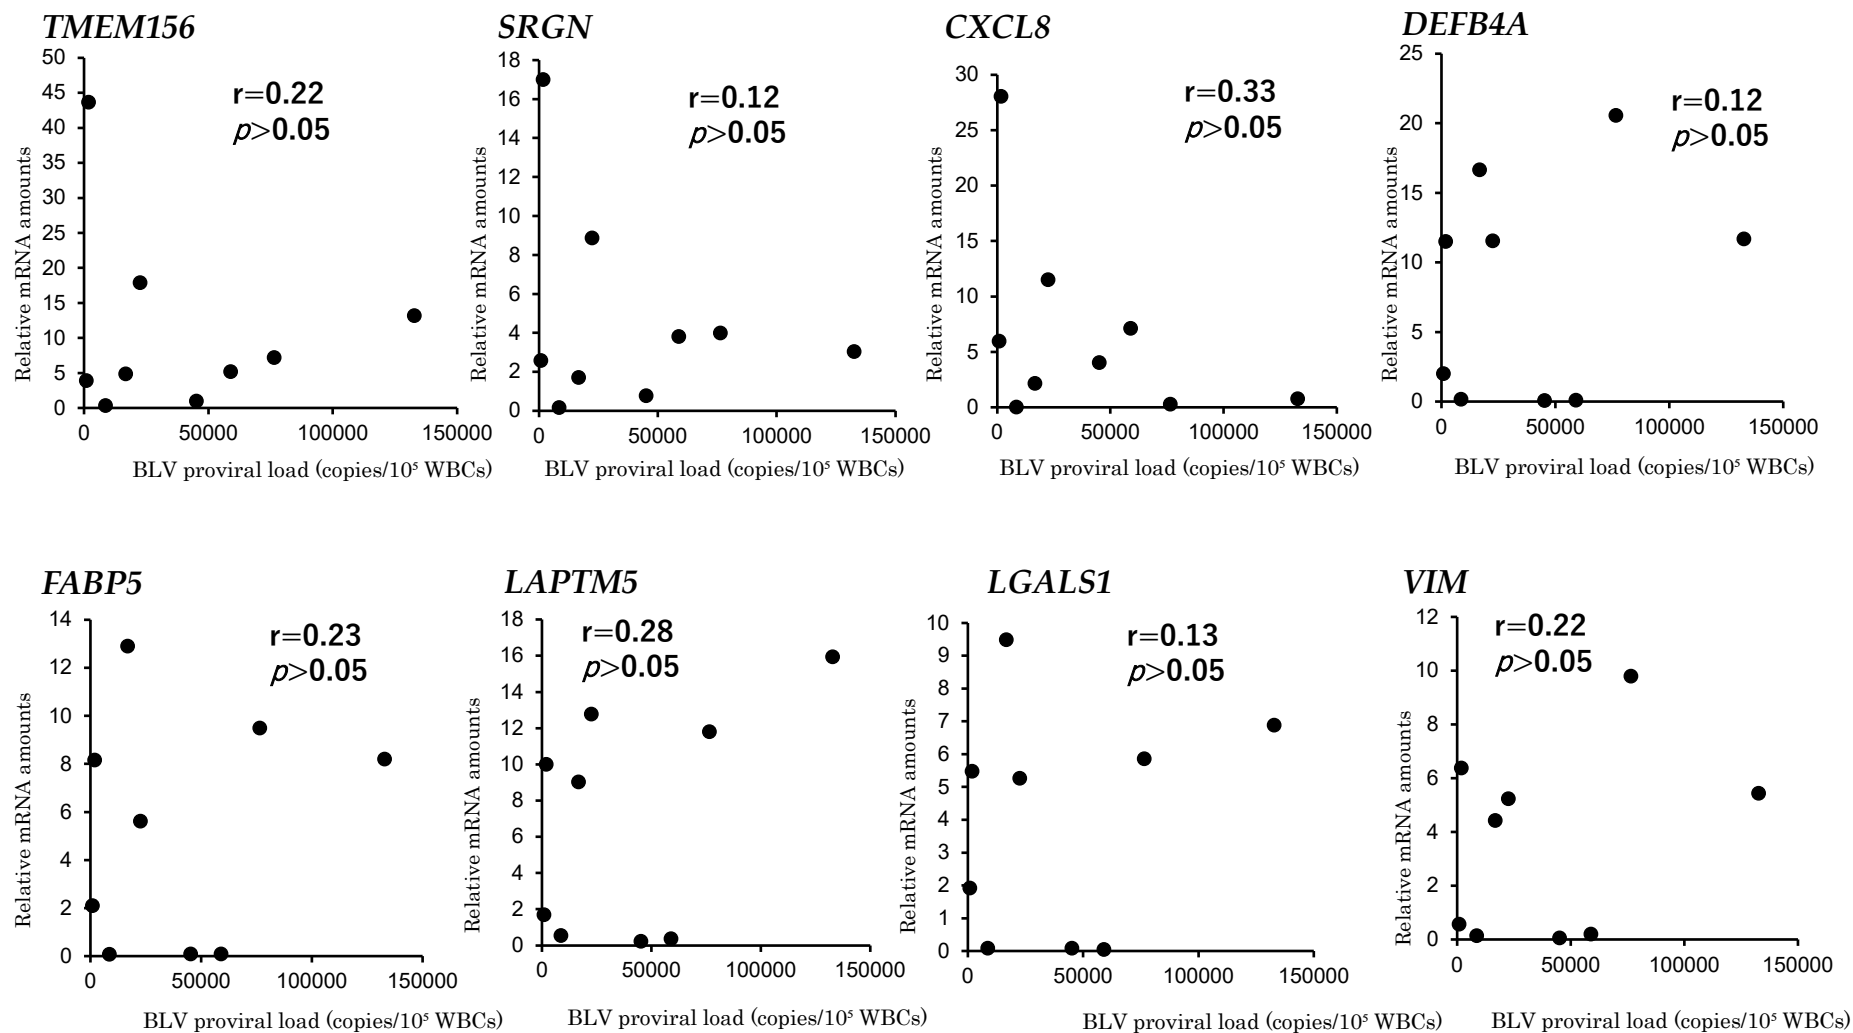

**Figure S1. Correlation between BLV proviral load and amounts of mRNAs for biomarker candidates using milk small extracellular vesicles (sEVs).** The correlation between two continuous variables was determined using Spearman's bivariate correlation analysis. There was no relation between BLV proviral load and amounts of mRNAs for candidate biomarkers in milk sEVs. ※ WBCs, white blood cells.

● EBL cattle (n=9)

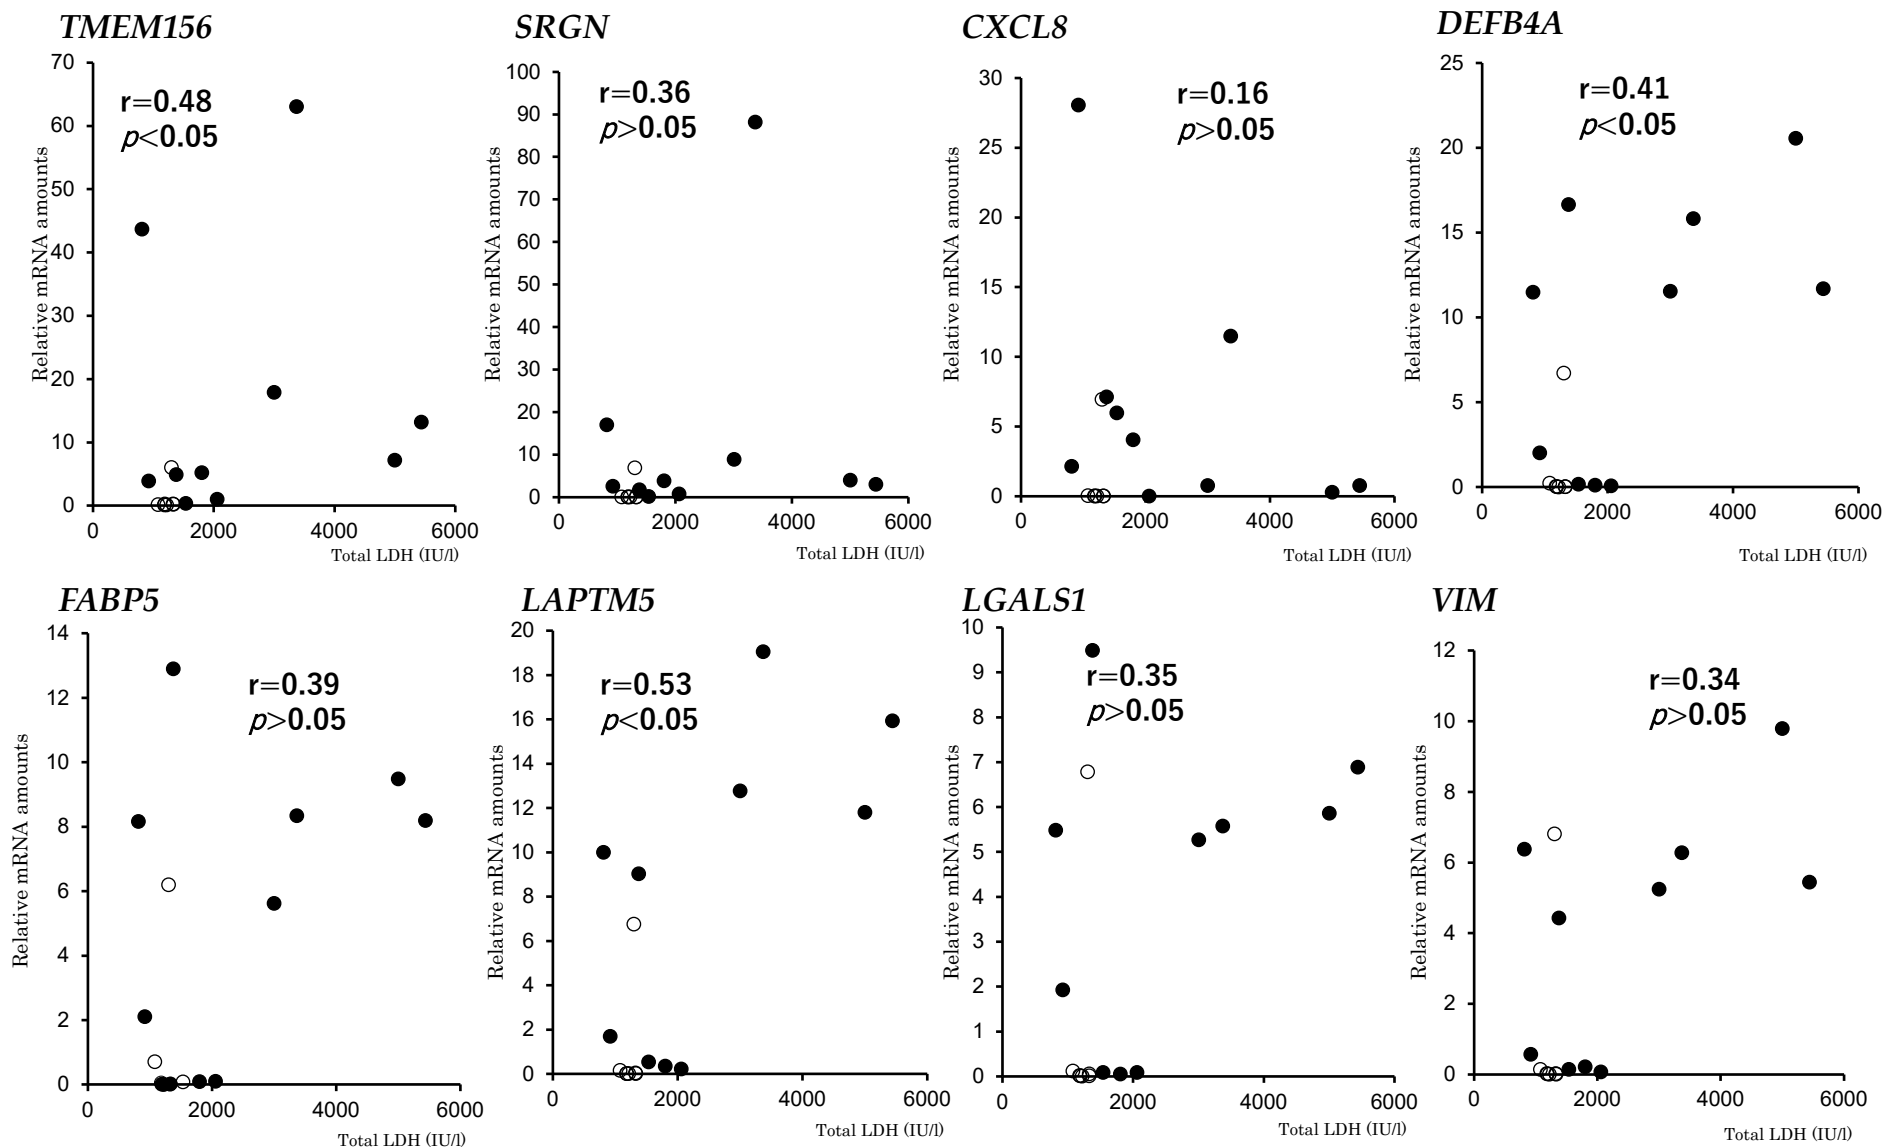

**Figure S2. Correlation between **total LDH (IU/l)** and amounts of mRNAs for biomarker candidates using milk small extracellular vesicles (sEVs).** The correlation between two continuous variables was determined using Spearman's bivariate correlation analysis. ※ LDH, Lactate dehydrogenase.

○ Uninfected cattle (n=7)

● EBL cattle (n=10)

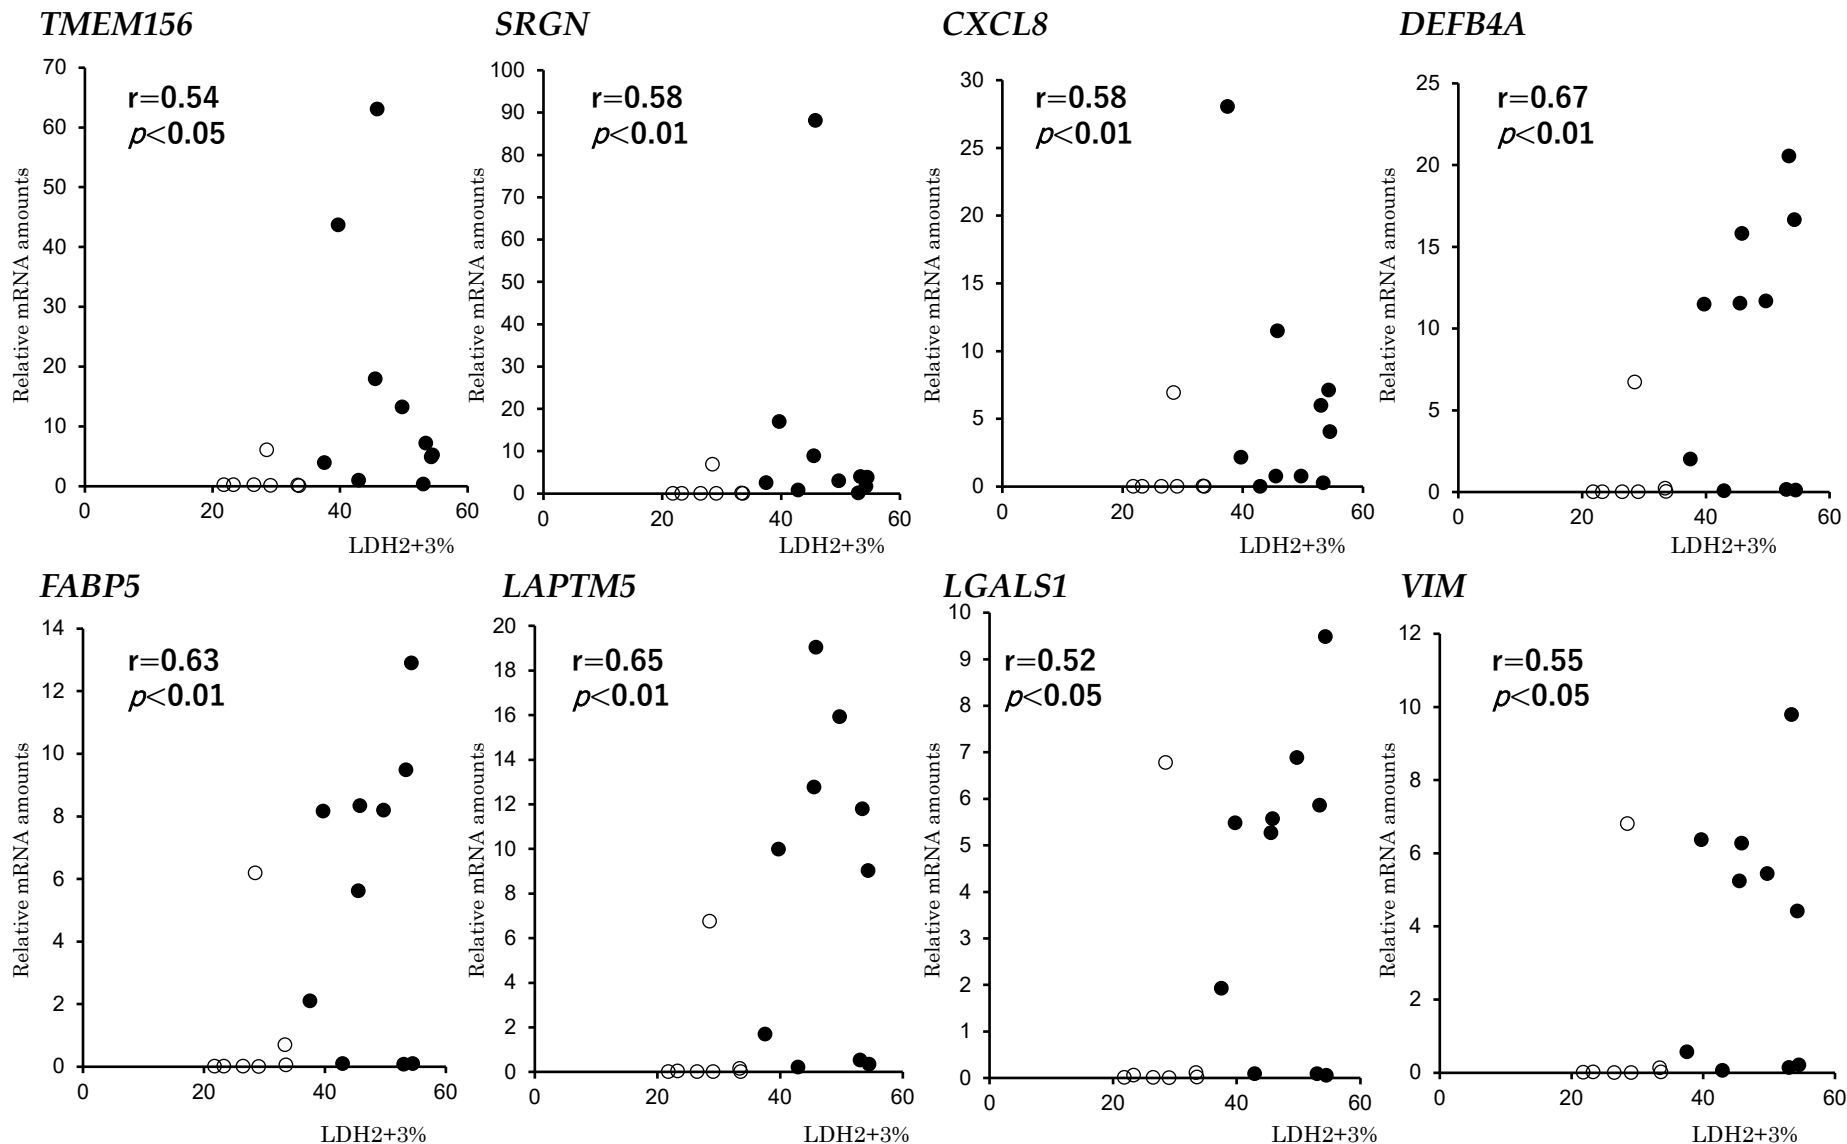

**Figure S3. Correlation between **LDH 2+3%** and amounts of mRNAs for biomarker candidates using milk small extracellular vesicles (sEVs).** The correlation between two continuous variables was determined using Spearman's bivariate correlation analysis. ※ LDH, Lactate dehydrogenase.

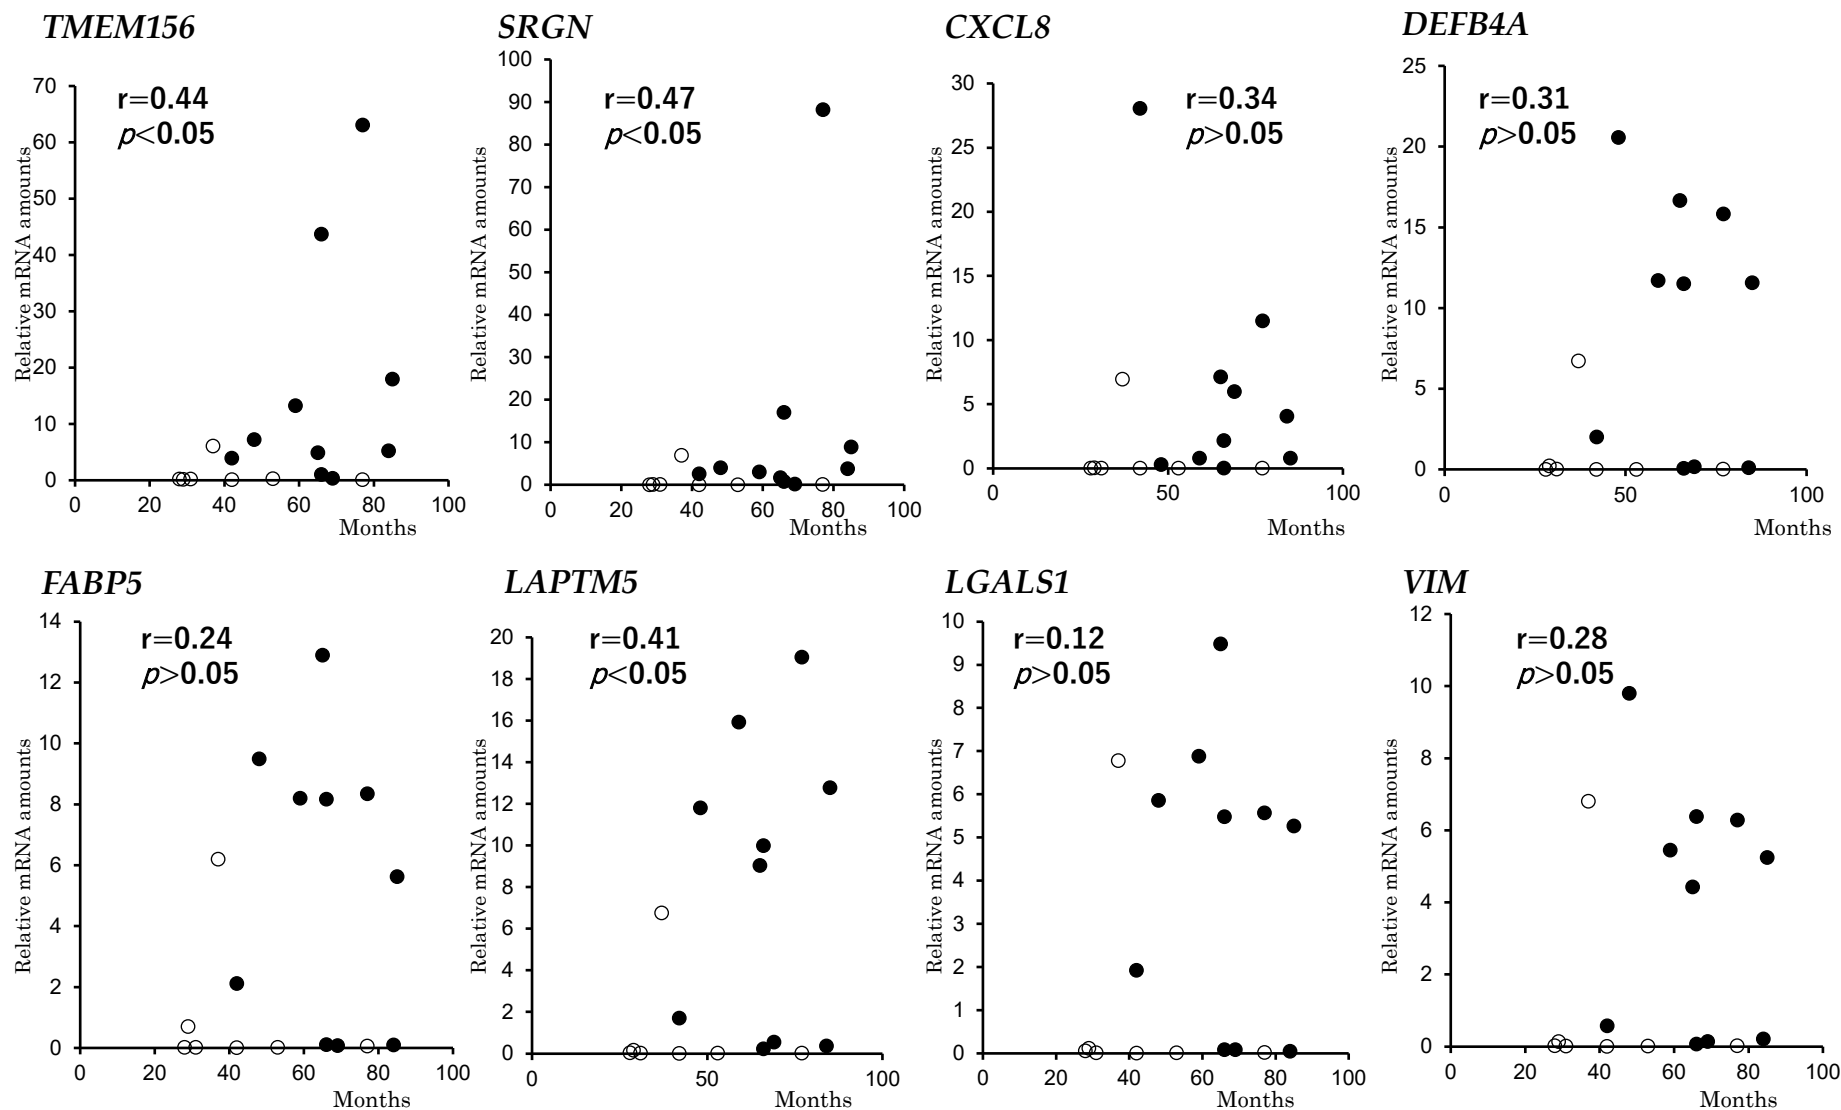

**Figure S4. Correlation between **age** and amounts of mRNAs for biomarker candidates using milk small extracellular vesicles (sEVs).** The correlation between two continuous variables was determined using Spearman's bivariate correlation analysis.

○ Uninfected cattle (n=7)  
 ● EBL cattle (n=10)

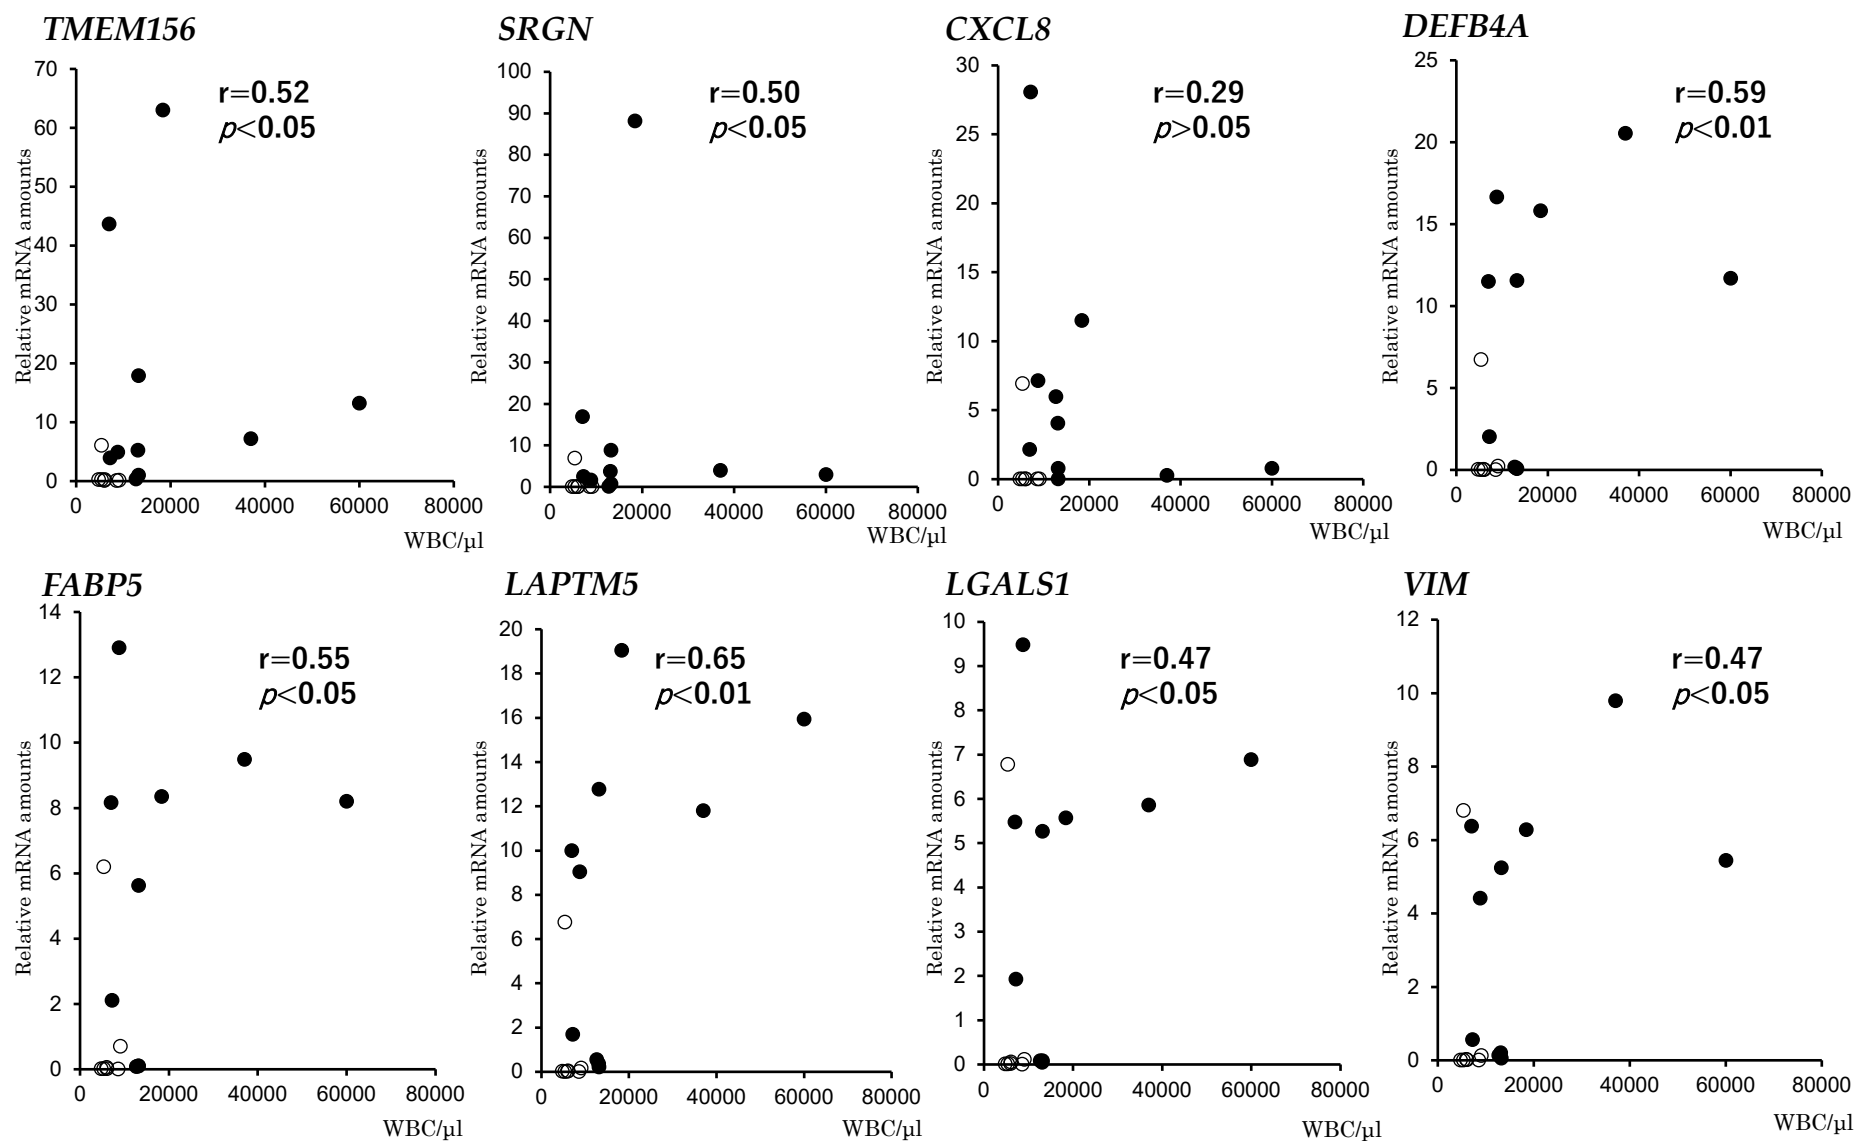

**Figure S5. Correlation between WBC counts and amounts of mRNAs for biomarker candidates using milk small extracellular vesicles (sEVs).** The correlation between two continuous variables was determined using Spearman's bivariate correlation analysis. ※ WBCs, white blood cells.

○ Uninfected cattle (n=7)  
● EBL cattle (n=10)

*TMEM156**SRGN**CXCL8**DEFB4A*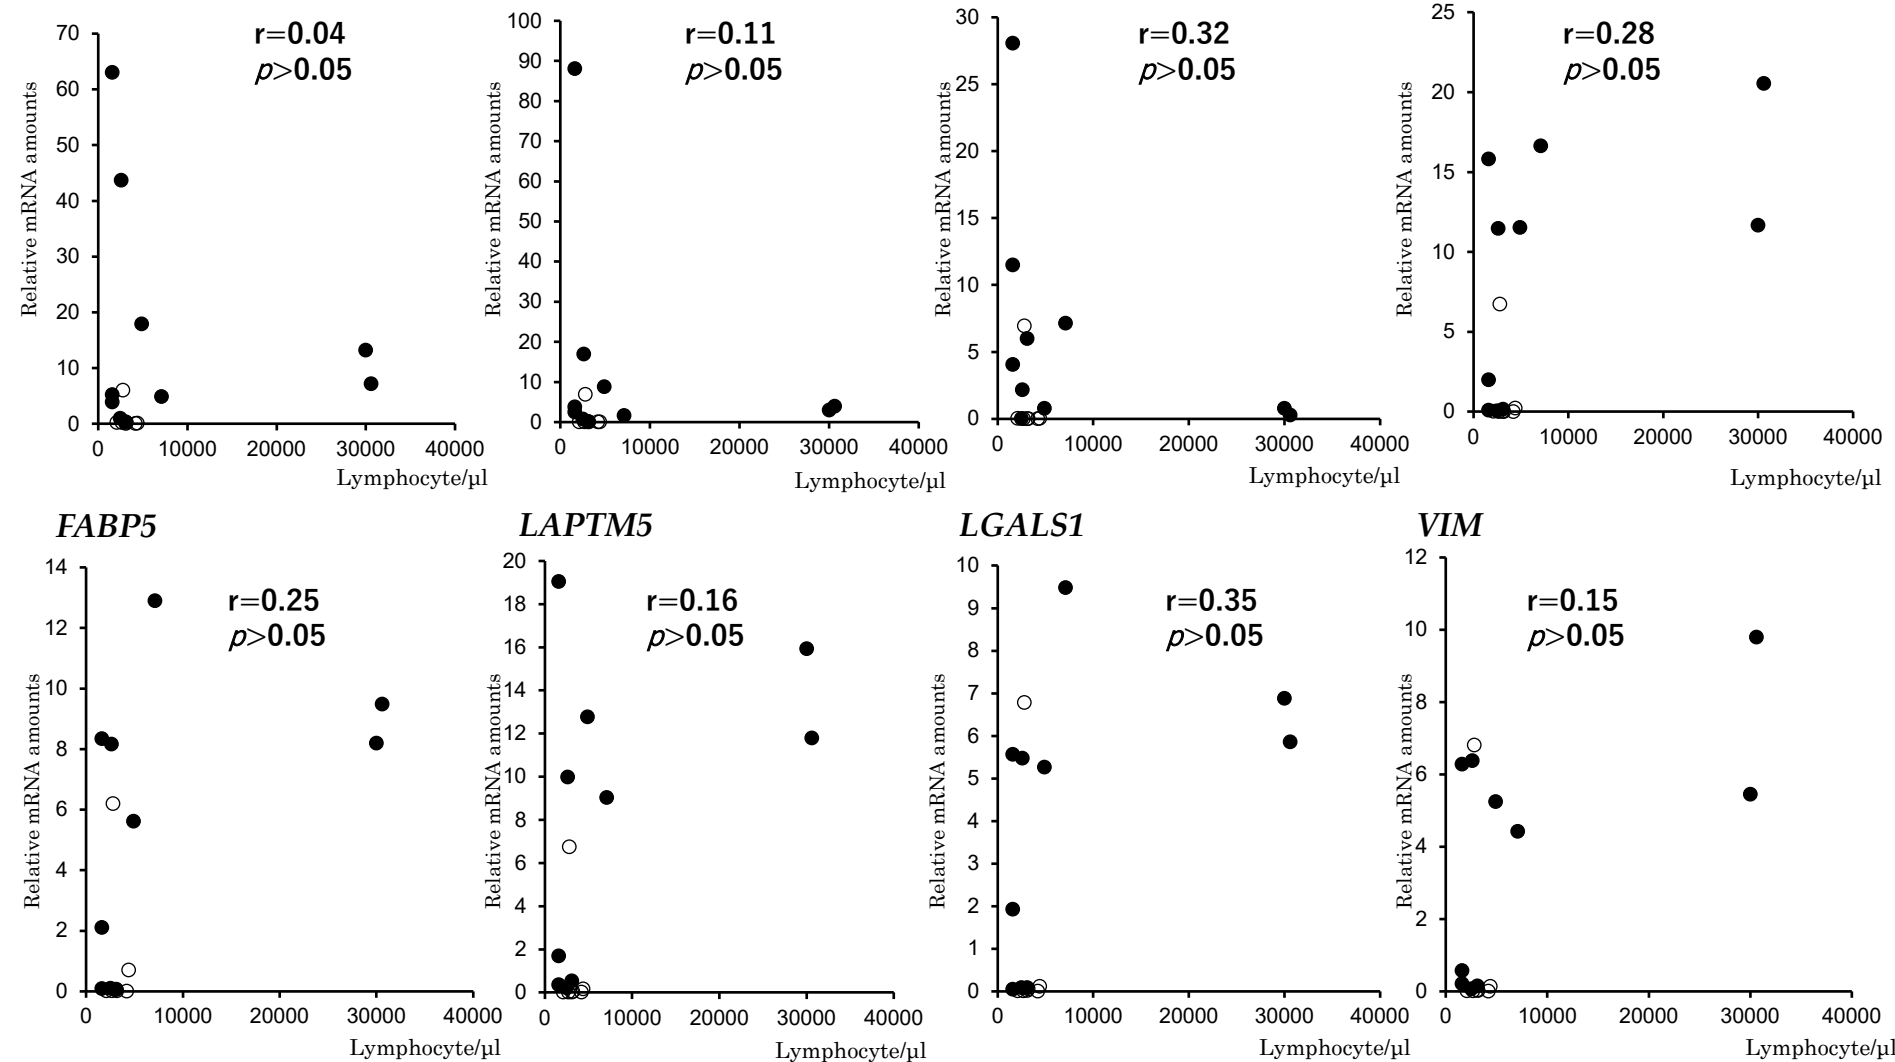

**Figure S6. Correlation between lymphocyte counts and amounts of mRNAs for biomarker candidates using milk small extracellular vesicles (sEVs).** The correlation between two continuous variables was determined using Spearman's bivariate correlation analysis. There was no relation between lymphocyte and amounts of mRNAs for candidate biomarkers in milk sEVs.

○ Uninfected cattle (n=7)

● EBL cattle (n=10)
